# Supplementary material for: Associations of Dietary Patterns and Risk of Hypertension in Southwest China: A Prospective Cohort Study
Source: MDPI journal article supplement (doi:10.3390/ijerph182312378), 2021-11-25
Supplement: s1 [file s1]

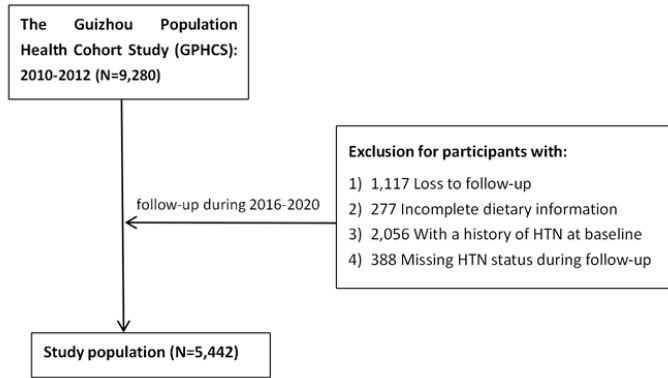

**Figure S1 The flow chart**

Abbreviations: HTN, hypertension.

**Table S1 Factor loading matrix after dietary pattern rotation and average daily intake of each food group (g)**

| Food category |                                          | Junk food pattern |        |        |                | Vegetable-grain pattern |        |        |                |
|---------------|------------------------------------------|-------------------|--------|--------|----------------|-------------------------|--------|--------|----------------|
|               |                                          | Low               | Medium | High   | Factor loading | Low                     | Medium | High   | Factor loading |
| Grain         | (rice, flour and coarse cereals, etc)    | 499.34            | 381.06 | 384.76 | -0.07          | 296.31                  | 405.73 | 563.12 | <b>0.38</b>    |
| Potato        | (potato, taro and sweet potato, etc)     | 11.13             | 20.23  | 35.83  | 0.14           | 21.54                   | 19.09  | 26.54  | 0.05           |
| Meat          | (pork, beef, mutton, chicken, duck, etc) | 78.22             | 100.73 | 133.39 | 0.12           | 60.78                   | 87.85  | 163.71 | 0.32           |
| Fish          | (fish, shrimp, crab, etc)                | 3.39              | 6.18   | 17.08  | 0.09           | 4.65                    | 7.86   | 14.15  | 0.12           |
| Vegetable     | (light- and dark-colored vegetables)     | 448.42            | 351.28 | 365.32 | -0.04          | 193.11                  | 355.35 | 616.56 | <b>0.55</b>    |
| Fruit         | (apple, banana, etc)                     | 27.43             | 45.78  | 101.60 | 0.15           | 32.51                   | 48.25  | 94.06  | 0.26           |
| Egg           |                                          | 15.52             | 11.15  | 20.85  | 0.07           | 18.43                   | 14.15  | 14.93  | -0.05          |
| Milk          |                                          | 1.94              | 4.44   | 33.17  | 0.16           | 15.51                   | 11.10  | 12.94  | -0.01          |
| Legume        | (soybean, mung,                          | 29.38             | 17.48  | 31.34  | 0.04           | 21.67                   | 24.35  | 32.18  | 0.08           |

|                                                              |       |       |       |       |       |       |       |       |
|--------------------------------------------------------------|-------|-------|-------|-------|-------|-------|-------|-------|
| etc)                                                         |       |       |       |       |       |       |       |       |
| Friedfood                                                    | 0.37  | 1.72  | 11.49 | 0.28  | 4.28  | 4.17  | 5.12  | 0.00  |
| (seedcake,<br>deep-fried<br>dough stick, etc)                |       |       |       |       |       |       |       |       |
| Soft drink (fruit<br>beverage,<br>carbonated<br>drinks, etc) | 0.77  | 4.86  | 76.63 | 0.54  | 26.21 | 30.15 | 25.90 | -0.01 |
| Dessert (bread,<br>cake, etc)                                | 0.26  | 1.06  | 14.23 | 0.51  | 6.78  | 4.76  | 4.00  | -0.05 |
| Oil (soybean oil,<br>olive oil, etc)                         | 32.29 | 47.83 | 54.17 | 0.10  | 43.81 | 46.43 | 44.06 | -0.01 |
| Pickles                                                      | 7.83  | 4.94  | 6.58  | -0.02 | 5.52  | 5.14  | 8.69  | 0.07  |
| Sufu                                                         | 2.01  | 0.95  | 1.69  | 0.00  | 2.07  | 1.06  | 1.51  | -0.03 |
| Soybean paste                                                | 1.38  | 0.75  | 1.77  | 0.02  | 1.81  | 0.88  | 1.21  | -0.04 |

**Table S2 Common food list of the junk food pattern**

| Food category | Food item              | Local name |
|---------------|------------------------|------------|
| Friedfood     | Seedcake               | “油饼”       |
|               | Deep-fried dough stick | “油条”       |
| Soft drink    | Cola                   | “可乐”       |
|               | Sprite                 | “雪碧”       |
| Dessert       | Pineapple cake         | “凤梨酥”      |
|               | Yolk pie               | “蛋黄派”      |
|               | Mooncake               | “月饼”       |
